# Supplementary material
Source: Springer Nature journal article supplement (https://www.springerprofessional.de/resource/supplementary/40095_2012_29_MOESM3_ESM.pdf/11899664)

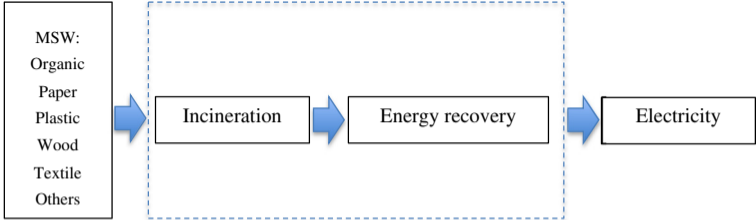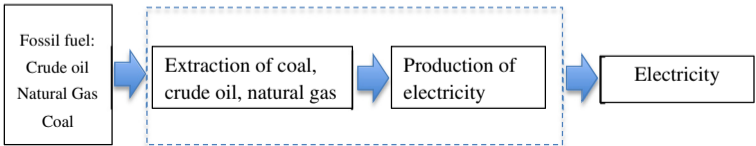

Supplement: MOESM3 [file 11899664]
